# Supplementary material for: An Expanded Heterogeneous Particle Swarm Optimization Based on Adaptive Inertia Weight
Source: Hindawi journal article supplement (doi:10.1155/2021/4194263), 2021-10-12
Supplement: f1 [file 4194263.f1.zip]

Archive with 7 entries (7 files):
- 4194263.f1/funcRange.m
- 4194263.f1/MSPS.m
- 4194263.f1/MSPSO_funcP1.m
- 4194263.f1/MSPSO_funcP2.m
- 4194263.f1/objFunc.m
- 4194263.f1/Supplementary Description.docx
- 4194263.f1/w_Gen.m
