# Supplementary material for: An Expanded Heterogeneous Particle Swarm Optimization Based on Adaptive Inertia Weight
Source: Hindawi journal article supplement (doi:10.1155/2021/4194263), 2021-10-12
Supplement: f1 [file 4194263.f1.zip › 4194263.f1/MSPS.m]

clc;clear all;close all;
NGen =2000;
gap = 2:(NGen/25):NGen;
numIter=NGen;
sNP = 8;
i=1:numIter;
acc = [1.49445, 1.49445];
iwt = [0.9, 0.35];  
total_w=5;
coleur={'-or','-ob','-og','-ok','-om','-oy ','-+r','g','k','b'};
myBestChart={};
tabbest=[];
tabendbest=[];
tabendbestf=[];
tabmoyf=[];
tabstdf=[];
tabtime=[];
tabw=[];
for funcNum =2;
    [Lb,Ub,dim] = funcRange(funcNum); 
    param = struct( 'ParicleNumber',           sNP,...
                    'AccelerationConstants',   acc,...
                    'InteriaWeight',           iwt,...
                    'Dimension',               dim,...
                    'Ub',                      Ub,...
                    'Lb',                      Lb);

 
    for run =1:30;
        rand('state',sum(100*clock))
        
       
        fhd='objFunc';numIter=NGen;varargin={funcNum};
        [localVal_a,localVal_b,localVal_c,localVal_d,val_a,val_b,val_c,val_d,NP,acc,iwt,dim,Ub,Lb,mv,pos_a,pos_b,pos_c,pos_d,localPos_a,localPos_b,localPos_c,localPos_d,gval_a,gval_b,gval_c,gval_d,idx_a,idx_b,idx_c,idx_d,globalPos_a,globalPos_b,globalPos_c,globalPos_d,G,gVal,idx,globalPos,BestChart,w_max,w_min,vel_a,vel_b,vel_c,vel_d]= MSPSO_funcP1('objFunc',numIter,param,funcNum);
        
        for k=1:total_w
           tic
            wg = w_Gen(k,numIter,w_min,w_max,param,fhd,varargin,globalPos,gVal);
               
            aux = MSPSO_funcP2(wg,fhd,numIter,param,varargin,localVal_a,localVal_b,localVal_c,localVal_d,val_a,val_b,val_c,val_d,NP,acc,iwt,dim,Ub,Lb,mv,pos_a,pos_b,pos_c,pos_d,localPos_a,localPos_b,localPos_c,localPos_d,gval_a,gval_b,gval_c,gval_d,idx_a,idx_b,idx_c,idx_d,globalPos_a,globalPos_b,globalPos_c,globalPos_d,G,gVal,idx,globalPos,BestChart,w_max,w_min,vel_a,vel_b,vel_c,vel_d);
            myBestChart{k} =aux;
            tabendbest(k,run)=aux(gap(end));
            t=toc;
        end
        
        
        figure(run)
        for k=1:total_w
        semilogy(gap,myBestChart{k}(gap),coleur{k},'linewidth',1.4,'Markersize',3);
        hold on;
 title({strcat('\fontsize{12}\bf Function: F',num2str(funcNum))});
         xlabel('\fontsize{12}\bf Iterations');
        ylabel('\fontsize{12}\bf Best-so-far');
        end
     legend('w1','w2','w3','w4','w5');
        legend('Constant','Random','Linear Time-varying','Sigmoid ','A-MsPSO');
        fprintf('R = %2d, time = %5.2f, best-so-far = %.8e\n', 'run',' t', BestChart(end))
        clc;
    end
clc;
    for k=1:total_w
        tabmoyf(k)=mean(tabendbest(k,:));
        tabstdf(k)=std(tabendbest(k,:));
        fprintf('_________________________________________________');
        fprintf(horzcat('\n __________ W ',num2str(k)));
        fprintf(horzcat('\n __________  Wmean=',num2str(tabmoyf(k))));
        fprintf(horzcat('\n __________ STD = ',num2str(tabstdf(k))));
        fprintf('\n');
        
    end
    
    
        
        
end
