# Supplementary material for: An Expanded Heterogeneous Particle Swarm Optimization Based on Adaptive Inertia Weight
Source: Hindawi journal article supplement (doi:10.1155/2021/4194263), 2021-10-12
Supplement: f1 [file 4194263.f1.zip › 4194263.f1/MSPSO_funcP1.m]

function [localVal_a,localVal_b,localVal_c,localVal_d,val_a,val_b,val_c,val_d,NP,acc,iwt,dim,Ub,Lb,mv,pos_a,pos_b,pos_c,pos_d,localPos_a,localPos_b,localPos_c,localPos_d,gval_a,gval_b,gval_c,gval_d,idx_a,idx_b,idx_c,idx_d,globalPos_a,globalPos_b,globalPos_c,globalPos_d,G,gVal,idx,globalPos,BestChart,w_max,w_min,vel_a,vel_b,vel_c,vel_d]= MSPSO_funcP1(fhd,numIter,param,varargin)
format short e

% make copies of parameters
NP  = param.ParicleNumber;
acc = param.AccelerationConstants;
iwt = param.InteriaWeight;
dim = param.Dimension;
Ub  = param.Ub;
Lb  = param.Lb;


mv = repmat(0.5*(Ub-Lb),1,dim);

w_max = iwt(1);
w_min = iwt(2);

pos_a = Lb+(Ub-Lb).*rand(NP,dim);
pos_b = Lb+(Ub-Lb).*rand(NP,dim);
pos_c = Lb+(Ub-Lb).*rand(NP,dim);
pos_d = Lb+(Ub-Lb).*rand(NP,dim);

vel_a = Lb+(Ub-Lb).*rand(NP,dim);
vel_b = Lb+(Ub-Lb).*rand(NP,dim);
vel_c = Lb+(Ub-Lb).*rand(NP,dim);
vel_d = Lb+(Ub-Lb).*rand(NP,dim);

for j = 1:NP
    val_a(j,1) = feval(fhd,pos_a(j,:),varargin{:});
    val_b(j,1) = feval(fhd,pos_b(j,:),varargin{:});
    val_c(j,1) = feval(fhd,pos_c(j,:),varargin{:});
    val_d(j,1) = feval(fhd,pos_d(j,:),varargin{:});
end
localPos_a = pos_a; localVal_a = val_a;
localPos_b = pos_b; localVal_b = val_b;
localPos_c = pos_c; localVal_c = val_c;
localPos_d = pos_d; localVal_d = val_d;

[gval_a, idx_a] = min(val_a(:,1));  globalPos_a = pos_a(idx_a,:);
[gval_b, idx_b] = min(val_b(:,1));  globalPos_b = pos_b(idx_b,:);
[gval_c, idx_c] = min(val_c(:,1));  globalPos_c = pos_c(idx_c,:);
[gval_d, idx_d] = min(val_d(:,1));  globalPos_d = pos_d(idx_d,:);

G = [globalPos_a; globalPos_b; globalPos_c; globalPos_d];
[gVal, idx] = min([gval_a; gval_b; gval_c; gval_d]);
globalPos = G(idx,:);

%   best record
BestChart = [];
BestChart = [BestChart; gVal];
