# Supplementary material for: An Expanded Heterogeneous Particle Swarm Optimization Based on Adaptive Inertia Weight
Source: Hindawi journal article supplement (doi:10.1155/2021/4194263), 2021-10-12
Supplement: f1 [file 4194263.f1.zip › 4194263.f1/Supplementary Description.docx]

Supplementary Description:

Our A-MsPSO algorithm and the full simulation results codes are available at supplementary file.

The utilized machine has a third-generation i3 processor of 2.5 GHz and 128 GB of storage capacity and the applied programming language is MATLAB.
