# Supplementary material for: An Expanded Heterogeneous Particle Swarm Optimization Based on Adaptive Inertia Weight
Source: Hindawi journal article supplement (doi:10.1155/2021/4194263), 2021-10-12
Supplement: f1 [file 4194263.f1.zip › 4194263.f1/w_Gen.m]

function [ w ] = w_Gen(id,numIter,w_min,w_max,param,fhd,varargin,~,gVal)
                      
% Cette fonction permet de générer un vecteur w selon plusieur equation
% suivant la valeur d'entrée id 

%% 

switch id
                            case 1
    for i=1:numIter
               w(i)=0.9;
    end
          case 2
        for i=1:numIter
            w(i)=0.5+(rand()/2);
          
        end
      case 3
        for i=1:numIter
            w(i) = ((numIter-i)/numIter)*(w_max-w_min)+w_min;   
        end
         case 4
        for i=1:numIter
    w(i)= [((w_min-w_max)/exp(10^(log(numIter)-2) ))*( i-2.6*numIter)]+w_max;
        end
         case 5
   
        for i=1:numIter
             w(i)= [w_min+(w_max-w_min)*[exp(((gVal-i)/(gVal+i))-1)/exp(((gVal-i)/(gVal+i))+1)]];
        end


end
